# Supplementary material for: Prediction of perinatal depression among women in Pakistan using Hybrid RNN-LSTM model
Source: PeerJ journal article supplement (doi:10.7717/peerj-cs.2673), 2025-02-26
Supplement: Sociodemographic.pdf [file Sociodemographic.pdf]

## **SOCIO-DEMOGRAPHIC QUESTIONNAIRE**

**DIRECTIONS:** Please answer each question as accurately as possible by tick the correct answer or filling in the space provided.

1. Age: \_\_\_\_\_
2. Gestational Age: \_\_\_\_\_
3. No. of Sons: \_\_\_\_\_
4. No. of Daughters: \_\_\_\_\_
5. Gravida: \_\_\_\_\_
6. Participant Education: \_\_\_\_\_
7. Husband Education: \_\_\_\_\_
8. Working Status: Working Lady/ Housewife
9. Previous Miscarriage: Yes/No
10. Physical Health: Healthy / Disability
11. Sufficient money for basic needs: Yes/No
12. Acceptance of the current appearance: Yes/ No
13. Family System: Nuclear/ Joint
14. Child Male Gender Preference: Yes/ No
15. Relationship with Mother-in-law: Good/ Moderate/Poor
